# Supplementary material
Source: Springer Nature journal article supplement (https://www.springermedizin.de/resource/supplementary/40248_2012_69_MOESM1_ESM.pdf/9686102)

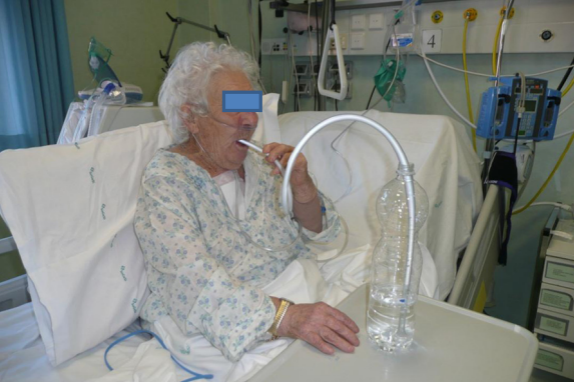

Supplement: MOESM1 [file 9686102]
